# Supplementary material for: Reactivation of a developmental Bmp2 signaling center is required for therapeutic control of the murine periosteal niche
Source: eLife journal article supplement (doi:10.7554/elife.42386), 2019-02-08
Supplement: supp [file elife-42386-supp-v1.zip]

Archive with 9 entries (9 files):
- elife_poa_e42386_Figure_1_figure_supplement_3.pdf
- elife_poa_e42386_Figure_11_figure_supplement_1.pdf
- elife_poa_e42386_Figure_2_figure_supplement_1.pdf
- elife_poa_e42386_Figure_9_figure_supplement_1.pdf
- elife_poa_e42386_Figure_2_figure_supplement_2.pdf
- elife_poa_e42386_Figure_1_figure_supplement_2.pdf
- elife_poa_e42386_Figure_9_figure_supplement_2.pdf
- elife_poa_e42386_Figure_1_figure_supplement_1.pdf
- elife_poa_e42386_Transparent_Reporting_File.docx
