# Supplementary material for: Reactivation of a developmental Bmp2 signaling center is required for therapeutic control of the murine periosteal niche
Source: eLife journal article supplement (doi:10.7554/elife.42386), 2019-02-08

Figure 2—figure supplement 2  
 Salazar et al, *Reactivation of a developmental Bmp2 signaling center is required for therapeutic control of the periosteal niche*

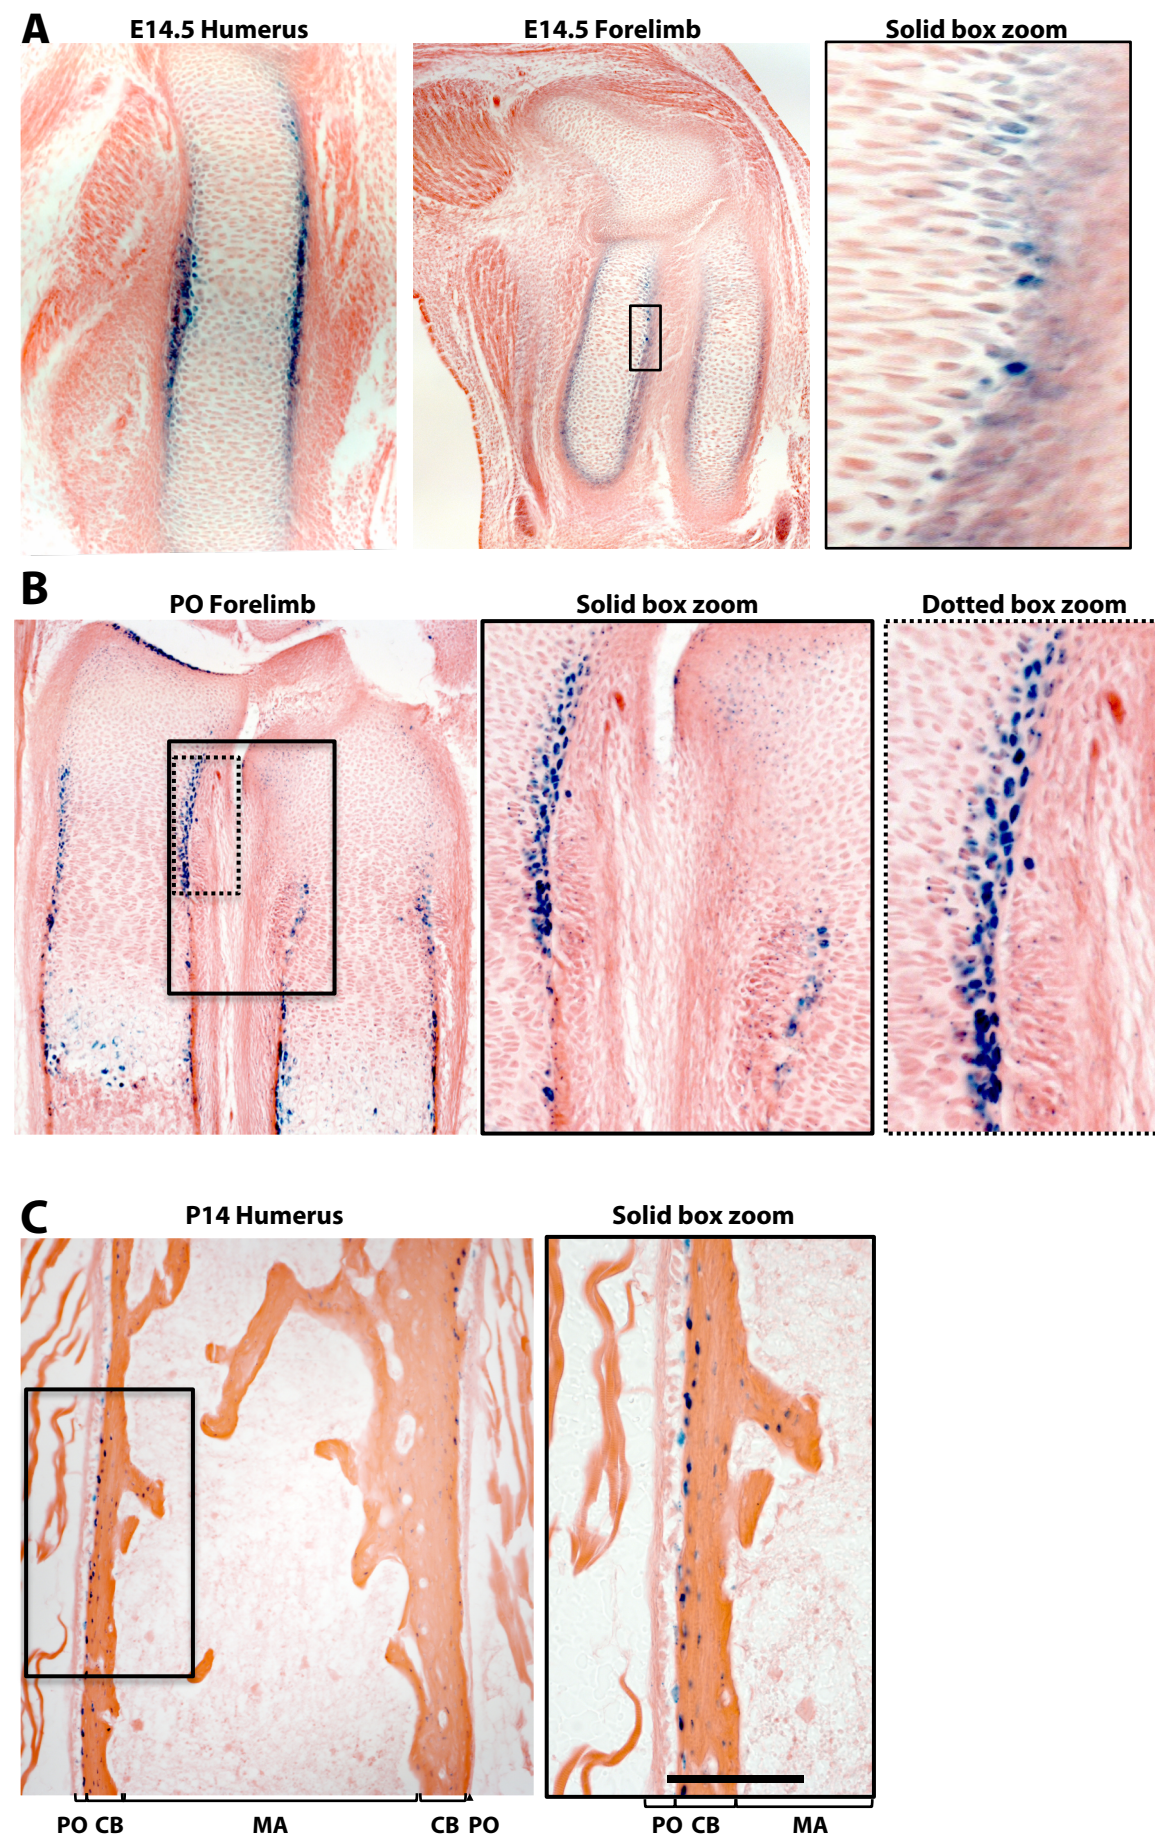

Supplement: supp [file elife-42386-supp-v1.zip › elife_poa_e42386_Figure_2_figure_supplement_2.pdf]
