# Supplementary material for: Reactivation of a developmental Bmp2 signaling center is required for therapeutic control of the murine periosteal niche
Source: eLife journal article supplement (doi:10.7554/elife.42386), 2019-02-08

Figure 9—figure supplement 2

Salazar et al, *Reactivation of a developmental Bmp2 signaling center is required for therapeutic control of the periosteal niche*

*Bmp2<sup>F/F</sup>; TdTomato<sup>F/+</sup>; Prx1-Cre; BRE:gfp<sup>Tg/+</sup>*

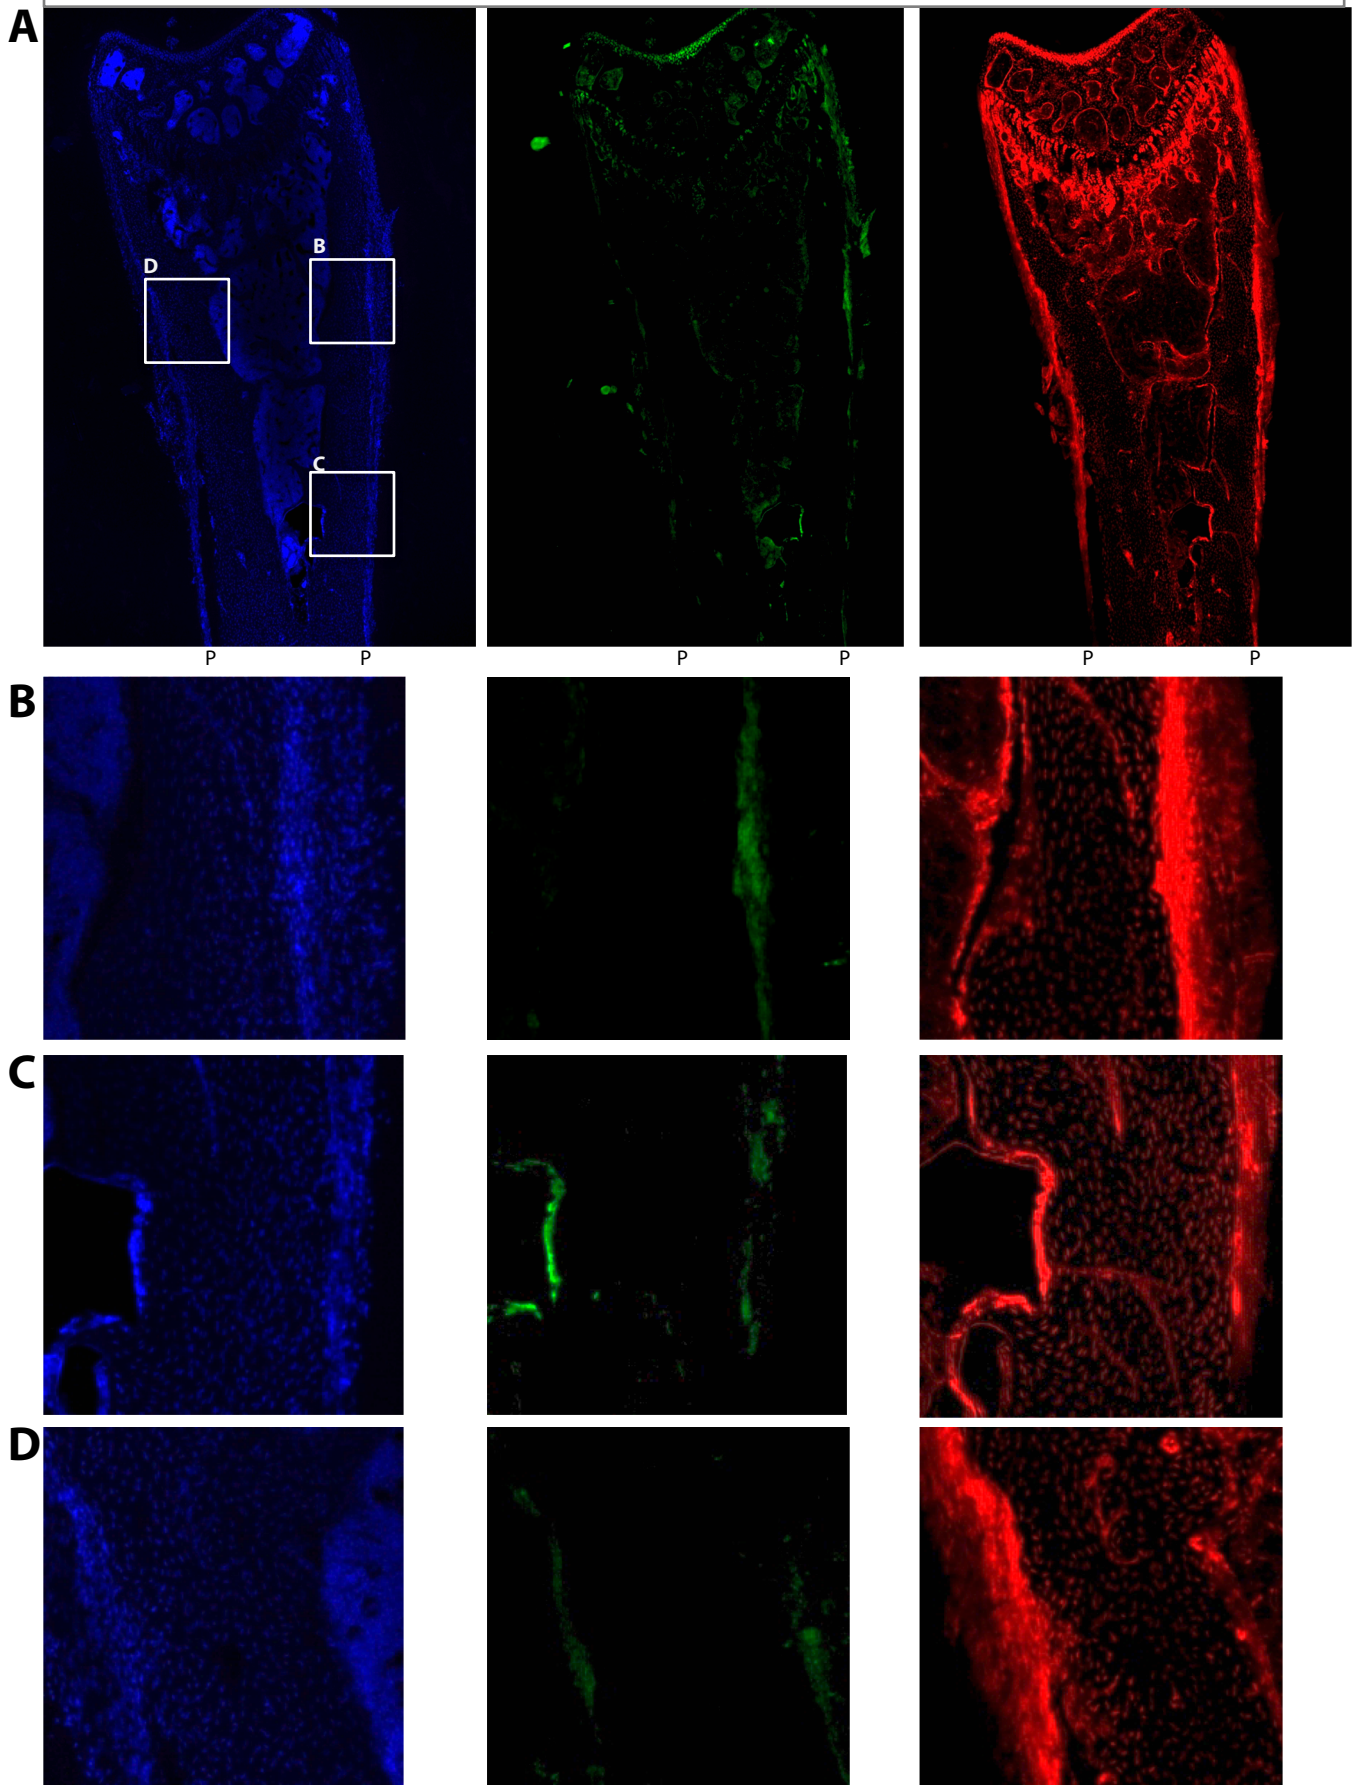

Supplement: supp [file elife-42386-supp-v1.zip › elife_poa_e42386_Figure_9_figure_supplement_2.pdf]
