# Supplementary figures and images for: Reactivation of a developmental Bmp2 signaling center is required for therapeutic control of the murine periosteal niche
Source: eLife journal article supplement (doi:10.7554/elife.42386), 2019-02-08

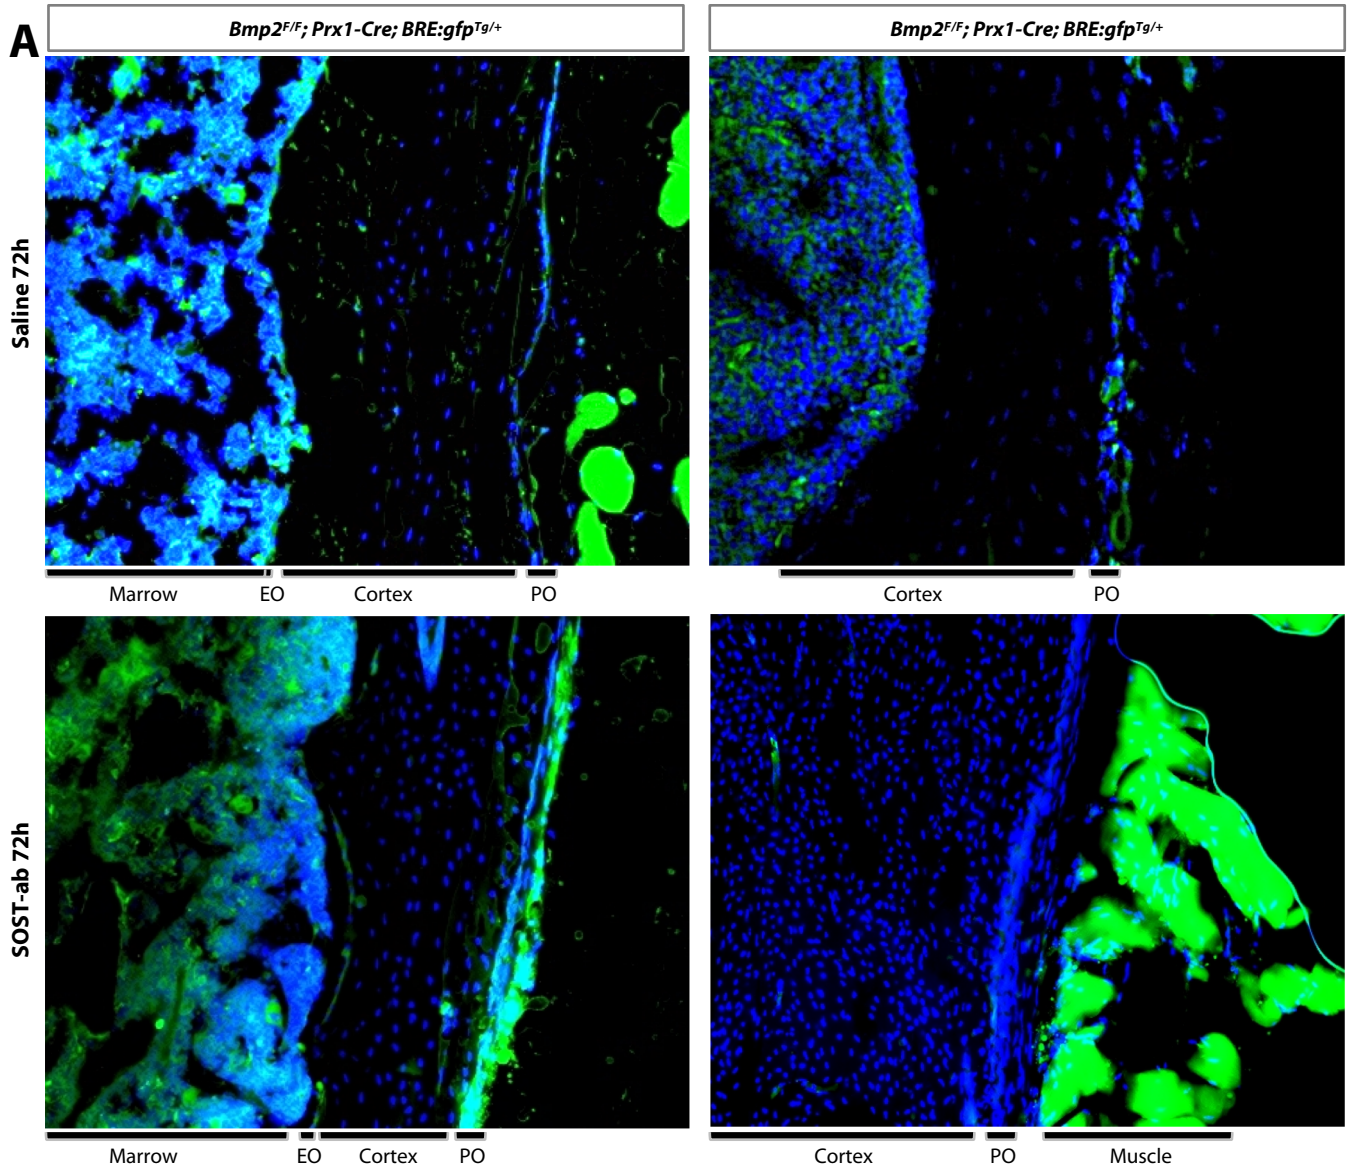

Supplement: supp [file elife-42386-supp-v1.zip]

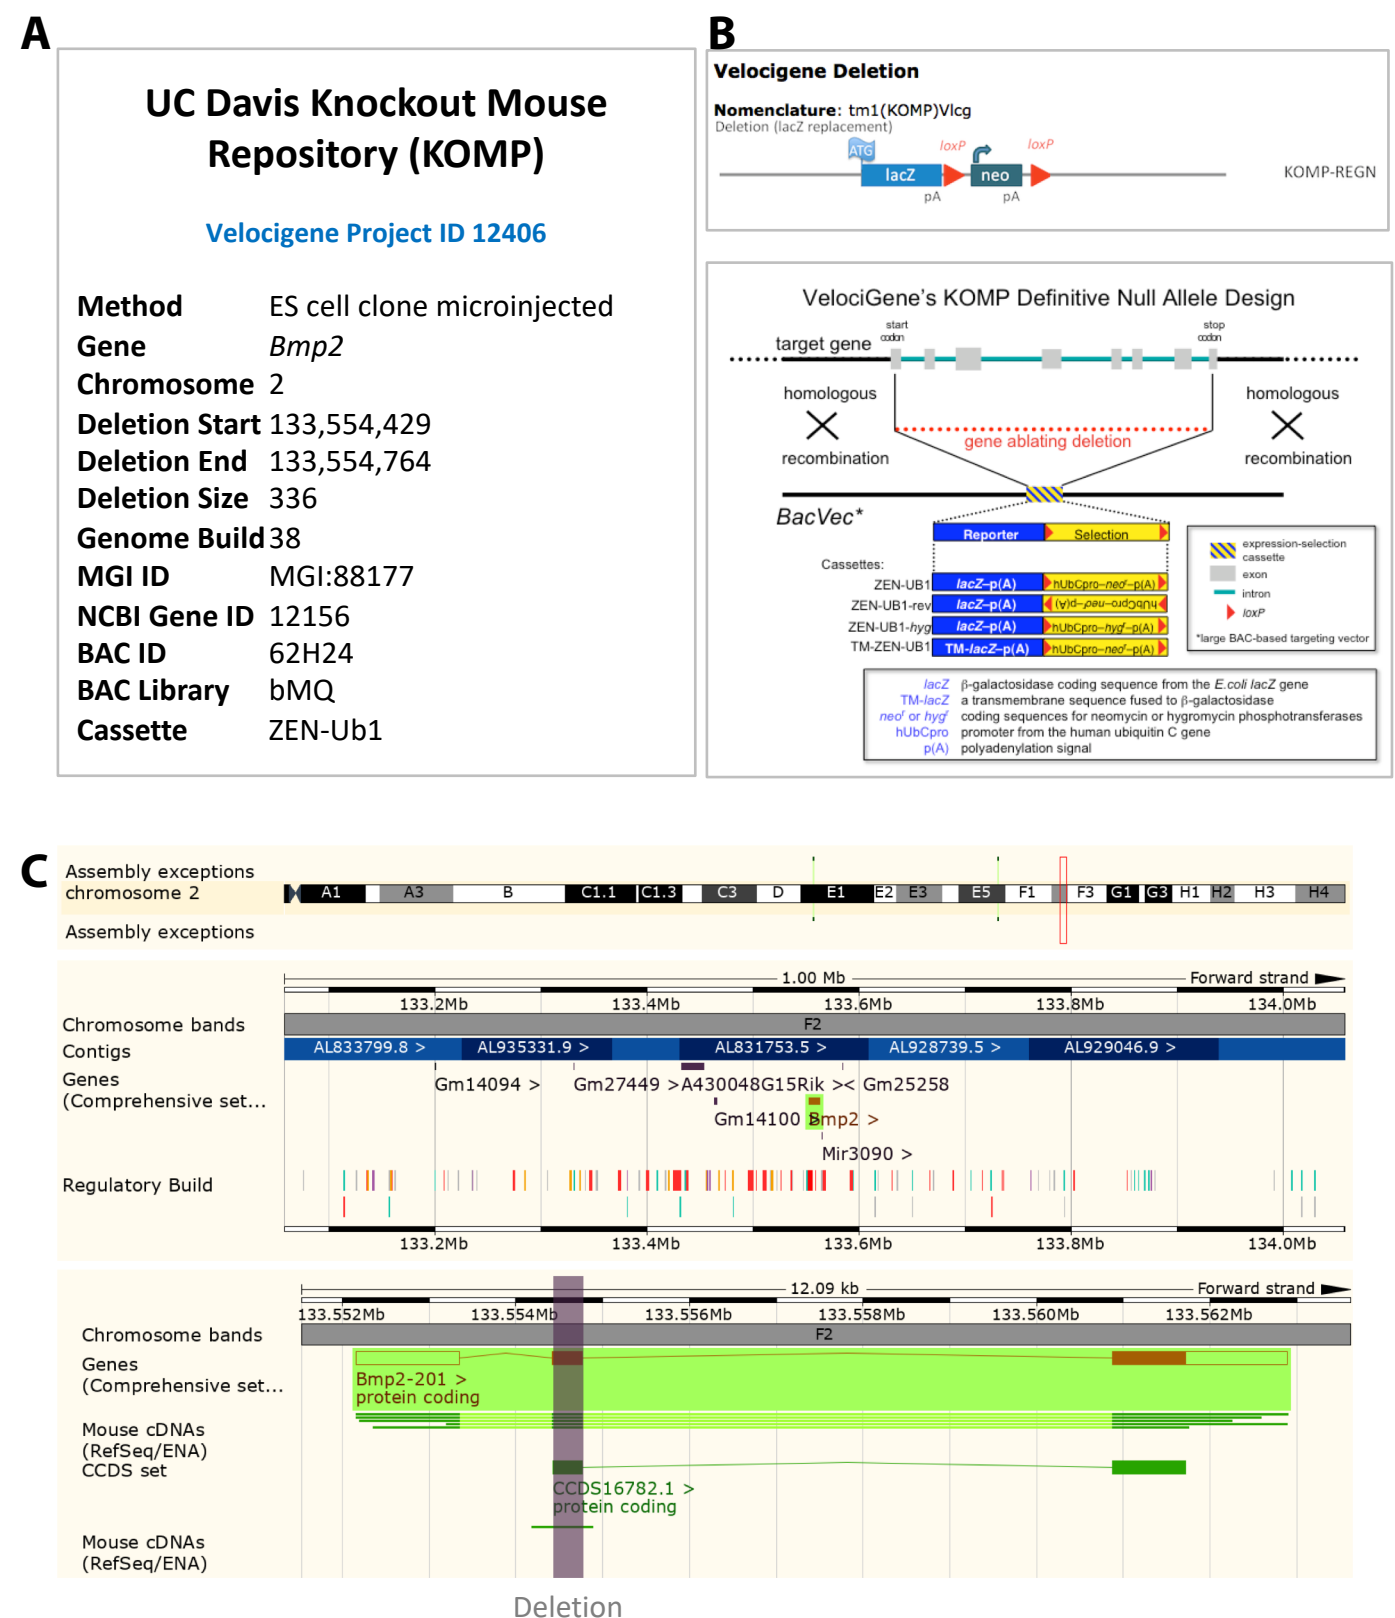

Supplement: supp [file elife-42386-supp-v1.zip]

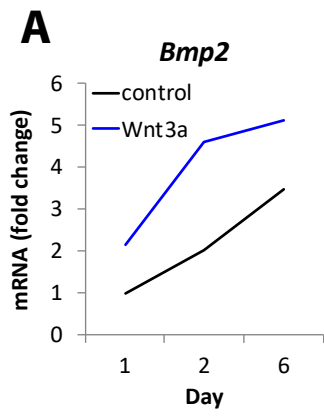

Supplement: supp [file elife-42386-supp-v1.zip › elife_poa_e42386_Figure_11_figure_supplement_1.pdf]

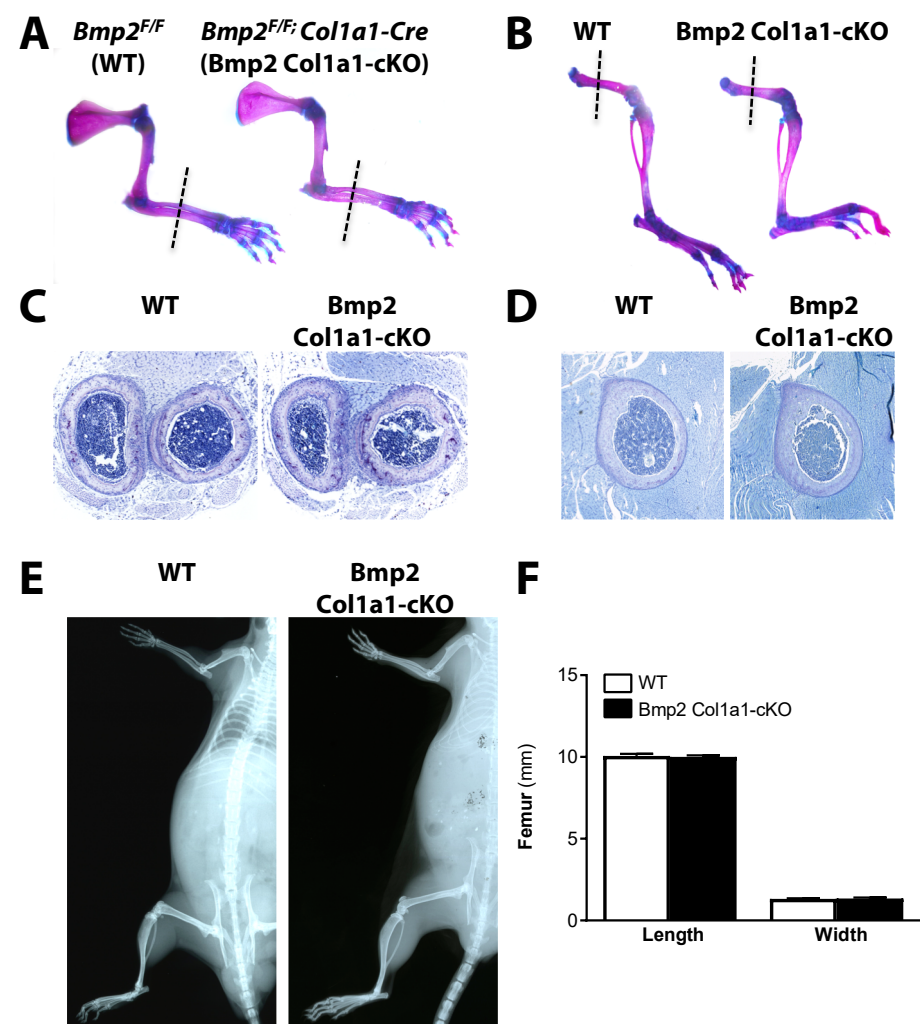

Supplement: supp [file elife-42386-supp-v1.zip › elife_poa_e42386_Figure_1_figure_supplement_2.pdf]

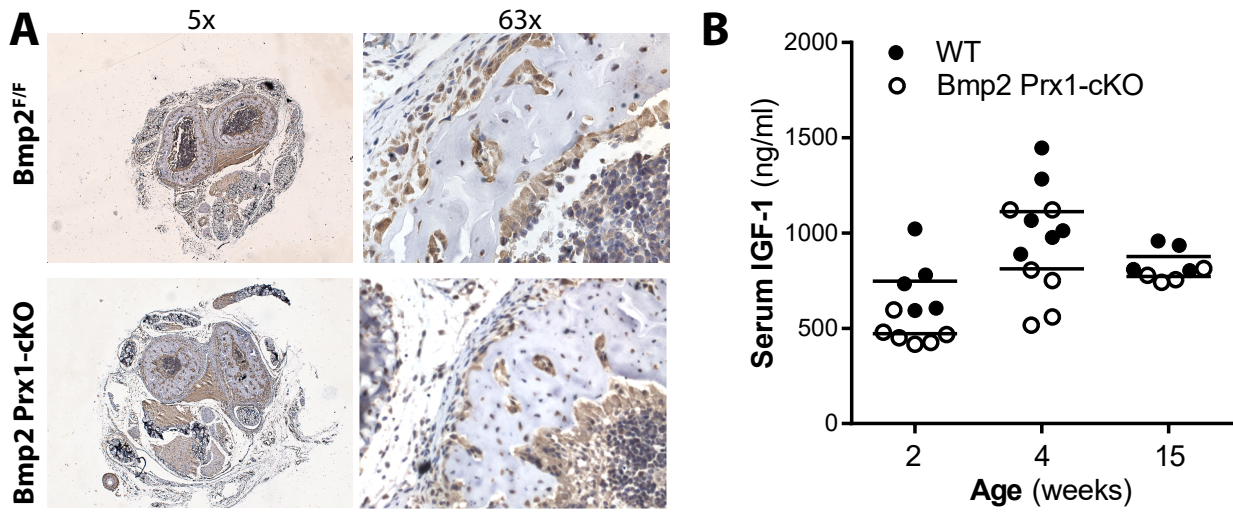

Supplement: supp [file elife-42386-supp-v1.zip › elife_poa_e42386_Figure_1_figure_supplement_1.pdf]
